# Supplementary material for: Cited4 is a sex‐biased mediator of the antidiabetic glitazone response in adipocyte progenitors
Source: PubMed Central journal article supplement (PMC6079535; doi:10.15252/emmm.201708613), 2018-07-04
Supplement: EMMM-10-e8613-s002.pdf [file EMMM-10-e8613-s002.pdf]

## Expanded View Figures

### Figure EV1. *Cited4* is a target of rosiglitazone in murine adipocyte progenitors promoting beige differentiation.

- A mRNA expression in C3H10T1/2 cells, differentiated in the presence of 1  $\mu$ M Rosi or vehicle for the indicated time, as determined by qRT-PCR (day 0,  $n = 3$ ; day 4,  $n = 4$ ; day 6, Ctrl,  $n = 2$ , Rosi,  $n = 4$ ; day 10,  $n = 4$ ). \*\*\* $P = 0.001$ , \*\* $P = 0.007$  (Day 6), \*\* $P = 0.005$  (Day 10), in  $2 \times 2$  ANOVA with Bonferroni's posttests (Rosi vs. vehicle).
- B mRNA expression in 3T3-L1 cells, differentiated in the presence of 1  $\mu$ M Rosi or vehicle for the indicated time, as determined by qRT-PCR ( $n = 3$ ).  $2 \times 2$  ANOVA with Bonferroni's posttests,  $P > 0.05$  (Rosi vs. vehicle).
- C mRNA expression in female Lin<sup>-</sup>Sca1<sup>+</sup> cells, differentiated in the presence of 0.1 or 1  $\mu$ M pioglitazone (Pio) or vehicle for 8 days, as determined by qRT-PCR ( $n = 4$  for Day 2,  $n = 4/2/6$  for Day 8). \*\*\* $P = 1 \times 10^{-10}$ , \*\* $P = 0.003$ , in  $2 \times 2$  ANOVA with Bonferroni's posttests (Pio vs. vehicle).
- D mRNA expression in female Lin<sup>-</sup>Sca1<sup>+</sup> cells, differentiated in the presence of the indicated substances for 8 days, as determined by qRT-PCR ( $n = 3$ ). \*\* $P = 0.0035$ , \*\*\* $P = 4 \times 10^{-10}$ , \*\*\* $P = 7 \times 10^{-10}$  (*Ucp1*), \* $P = 0.036$ , \*\*\* $P = 0.0002$ , \*\*\* $P = 1 \times 10^{-10}$ , \*\*\* $P = 1 \times 10^{-10}$  (*Cpt1b*), \*\*\* $P = 2 \times 10^{-5}$  (*Cidea*), \*\*\* $P = 1 \times 10^{-6}$ , \*\*\* $P = 4 \times 10^{-9}$ , \*\*\* $P = 1 \times 10^{-8}$ , (*Elavl3*), \*\*\* $P = 9 \times 10^{-8}$ , \*\*\* $P = 2 \times 10^{-7}$  (*Cox7a1*), \*\*\* $P = 0.0002$ , \*\*\* $P = 1 \times 10^{-8}$ , \*\*\* $P = 4 \times 10^{-5}$ , \*\*\* $P = 0.0002$  (*Cox8b*), \* $P = 0.032$ , \*\* $P = 0.006$ , \*\*\* $P = 0.0007$  (*Dio2*), \*\*\* $P = 1 \times 10^{-6}$ , \*\*\* $P = 2 \times 10^{-8}$  (*Cyc1*), \*\*\* $P = 8 \times 10^{-5}$ , \*\*\* $P = 3 \times 10^{-6}$  (*Ndufb3*) in  $2 \times 2$  ANOVA with Holm-Sidak posttests (*Cited4*<sup>-/-</sup> vs. *Cited4*<sup>+/+</sup>).
- E mRNA expression in male Lin<sup>-</sup>Sca1<sup>+</sup> progenitor cells, differentiated in the presence of 100 nM Rosi or vehicle for the indicated time, as determined by qRT-PCR ( $n = 3$ ). \*\*\*\* $P = 1 \times 10^{-10}$  (Days 2 and 4), \*\*\*\* $P = 4 \times 10^{-8}$  (Day 8) in  $2 \times 2$  ANOVA with Bonferroni's posttests (Rosi vs. vehicle).
- F mRNA expression in male Lin<sup>-</sup>Sca1<sup>+</sup> cells, differentiated in the presence of 100 nM Rosi or vehicle for 8 days, as determined by qRT-PCR ( $n = 3$ ,  $t$ -test).

Data information: Data are presented as mean  $\pm$  SEM except for (C) (individual data).

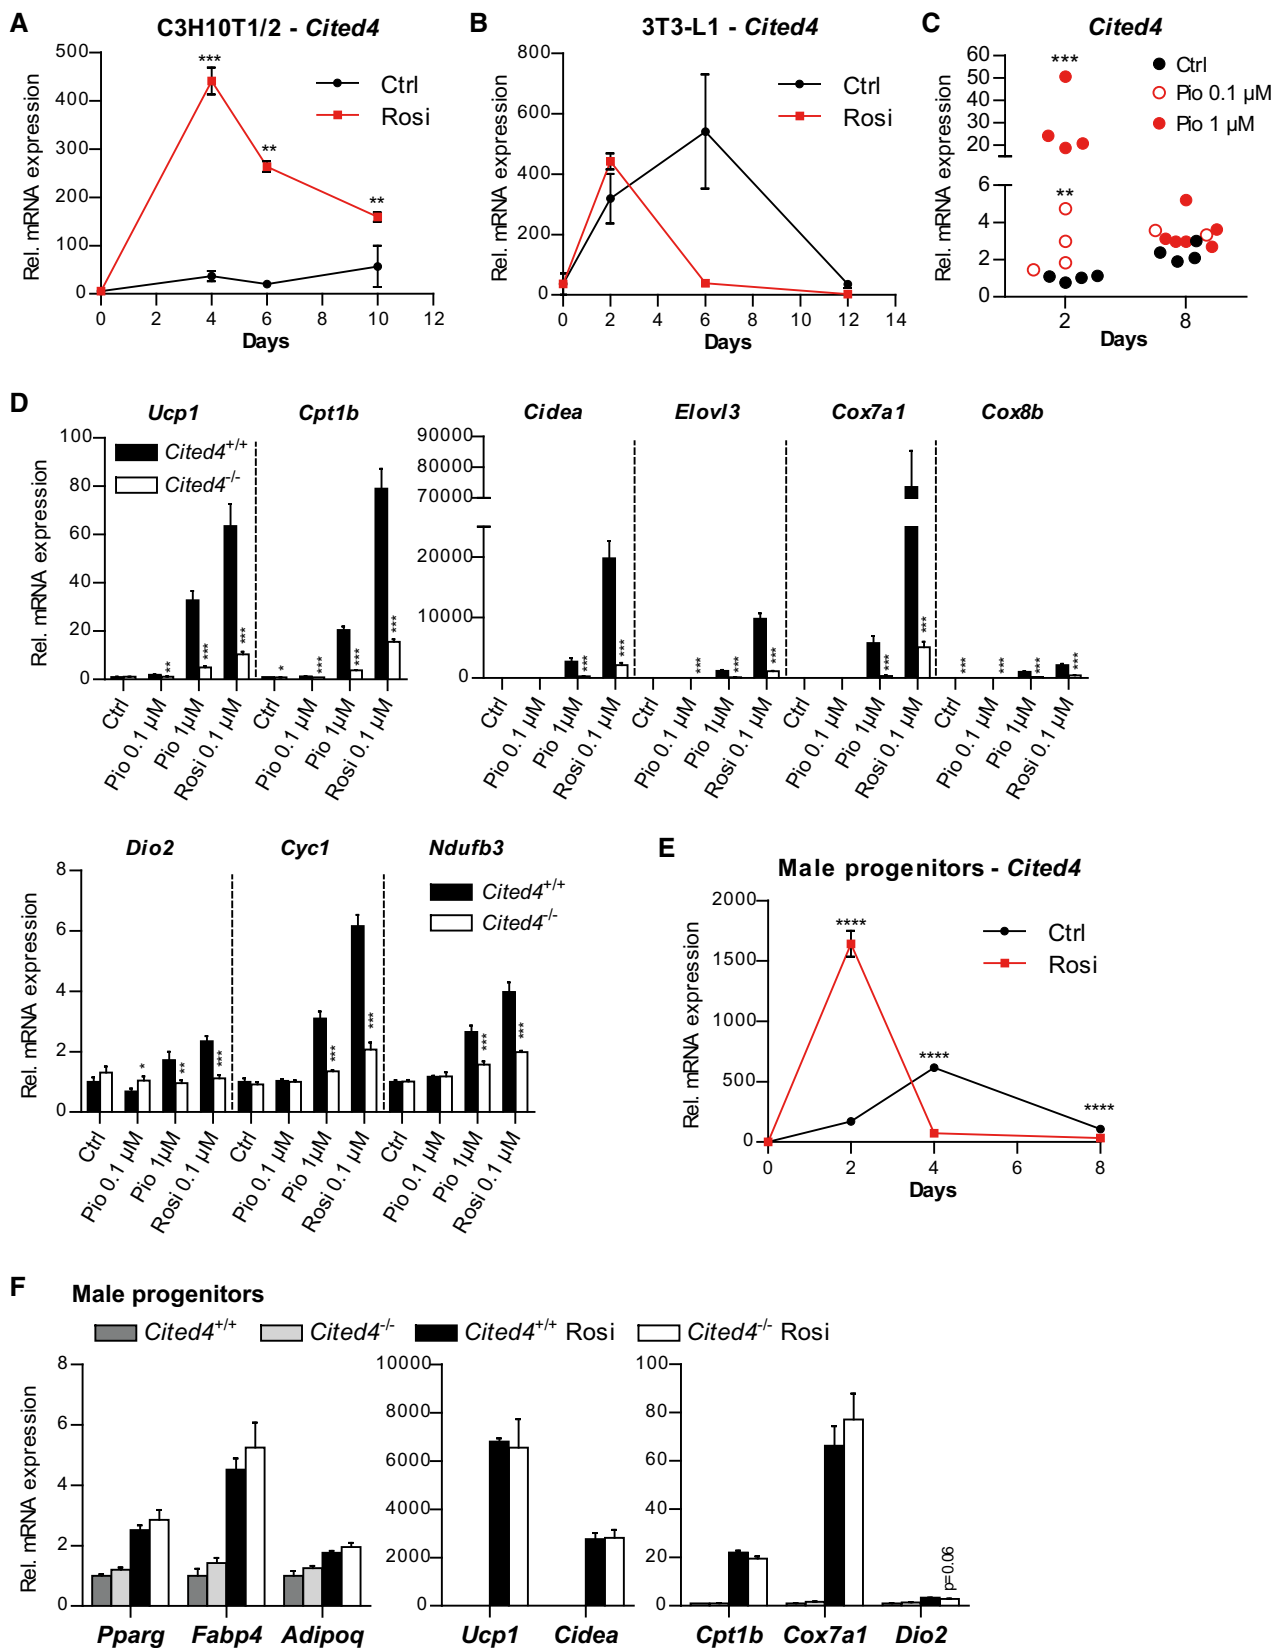

Figure EV1.

**Figure EV2. Cited4 is a target of rosiglitazone in murine and human adipocyte progenitors promoting beige differentiation.**

- A Phase contrast microscopy of primary SVF cells from human subcutaneous fat, differentiated in the presence of 100 nM Rosi or vehicle for 14 days (representative of  $n = 5$  patients). Scale bar is 100  $\mu\text{m}$ .
- B, C mRNA expression in primary SVF cells from human subcutaneous fat, differentiated in the presence of 100 nM Rosi or vehicle, as determined by qRT-PCR ( $n = 5$  patients). (B) \*\*\*\* $P = 1 \times 10^{-10}$  (Day 2), \*\*\*\* $P = 5 \times 10^{-8}$  (Day 6), \*\*\*\* $P = 1 \times 10^{-9}$  (Days 10 and 14), (C) \*\*\*\* $P = 7 \times 10^{-7}$  (Day 6), \*\*\*\* $P = 1 \times 10^{-9}$  (Days 10 and 14) in  $2 \times 2$  ANOVA with Bonferroni's posttests (Rosi vs. vehicle).
- D mRNA expression in primary SVF cells from human male subcutaneous fat transfected with the indicated siRNA prior to differentiation in the presence of 100 nM Rosi for 9 days, as determined by qRT-PCR ( $n = 3$ ). \*\*\* $P = 0.0002$  (*siCITED4.1 CITED4*), \*\*\* $P = 0.0003$  (*siCITED4.2 CITED4*), \*\* $P = 0.005$  (*UCP1*), \* $P = 0.01$  (*CIDEA*), \*\*\* $P = 0.0006$  (*CITED4.1 CPT1B*), \*\* $P = 0.007$  (*CPT1B*), \*\*\* $P = 0.0006$  (*CITED4.1 SLC2A4*), \*\* $P = 0.009$  (*ADIPOQ*) in ANOVA with Tukey's posttests (vs. *siCtrl*).
- E GFP fluorescence intensity distribution of  $\text{Lin}^- \text{Sca1}^+$  progenitor cells 24 hours after transfection with GFP mRNA, determined by flow cytometry (compared to non-transfected cells).
- F mRNA expression in female *Cited4*<sup>F/F</sup>  $\text{Lin}^- \text{Sca1}^+$  progenitor cells transfected with Cre or control mRNA prior to differentiation in the presence of 100 nM Rosi or vehicle for 8 days, as determined by qRT-PCR ( $n = 3$ ). *t*-test Cre vs. Ctrl (Rosi), \*\* $P = 0.002$  (*Cited4*), \* $P = 0.039$  (*Adipoq*), \* $P = 0.015$  (*Ucp1*), \* $P = 0.011$  (*Cidea*), \*\* $P = 0.004$  (*Cpt1b*), \* $P = 0.011$  (*Dio2*).
- G mRNA expression in female *Cited4*<sup>F/F</sup>  $\text{Lin}^- \text{Sca1}^+$  progenitor cells transfected with Cre or control mRNA 3 days after induction of differentiation in the presence of 100 nM Rosi or vehicle for 8 days, as determined by qRT-PCR ( $n = 4$ ). *t*-test Cre vs. Ctrl, \*\*\* $P = 0.0005$  (*Cited4*), \*\* $P = 0.009$  (*Cpt1b*).

Data information: Data are presented as mean  $\pm$  SEM except for (E) (individual data).

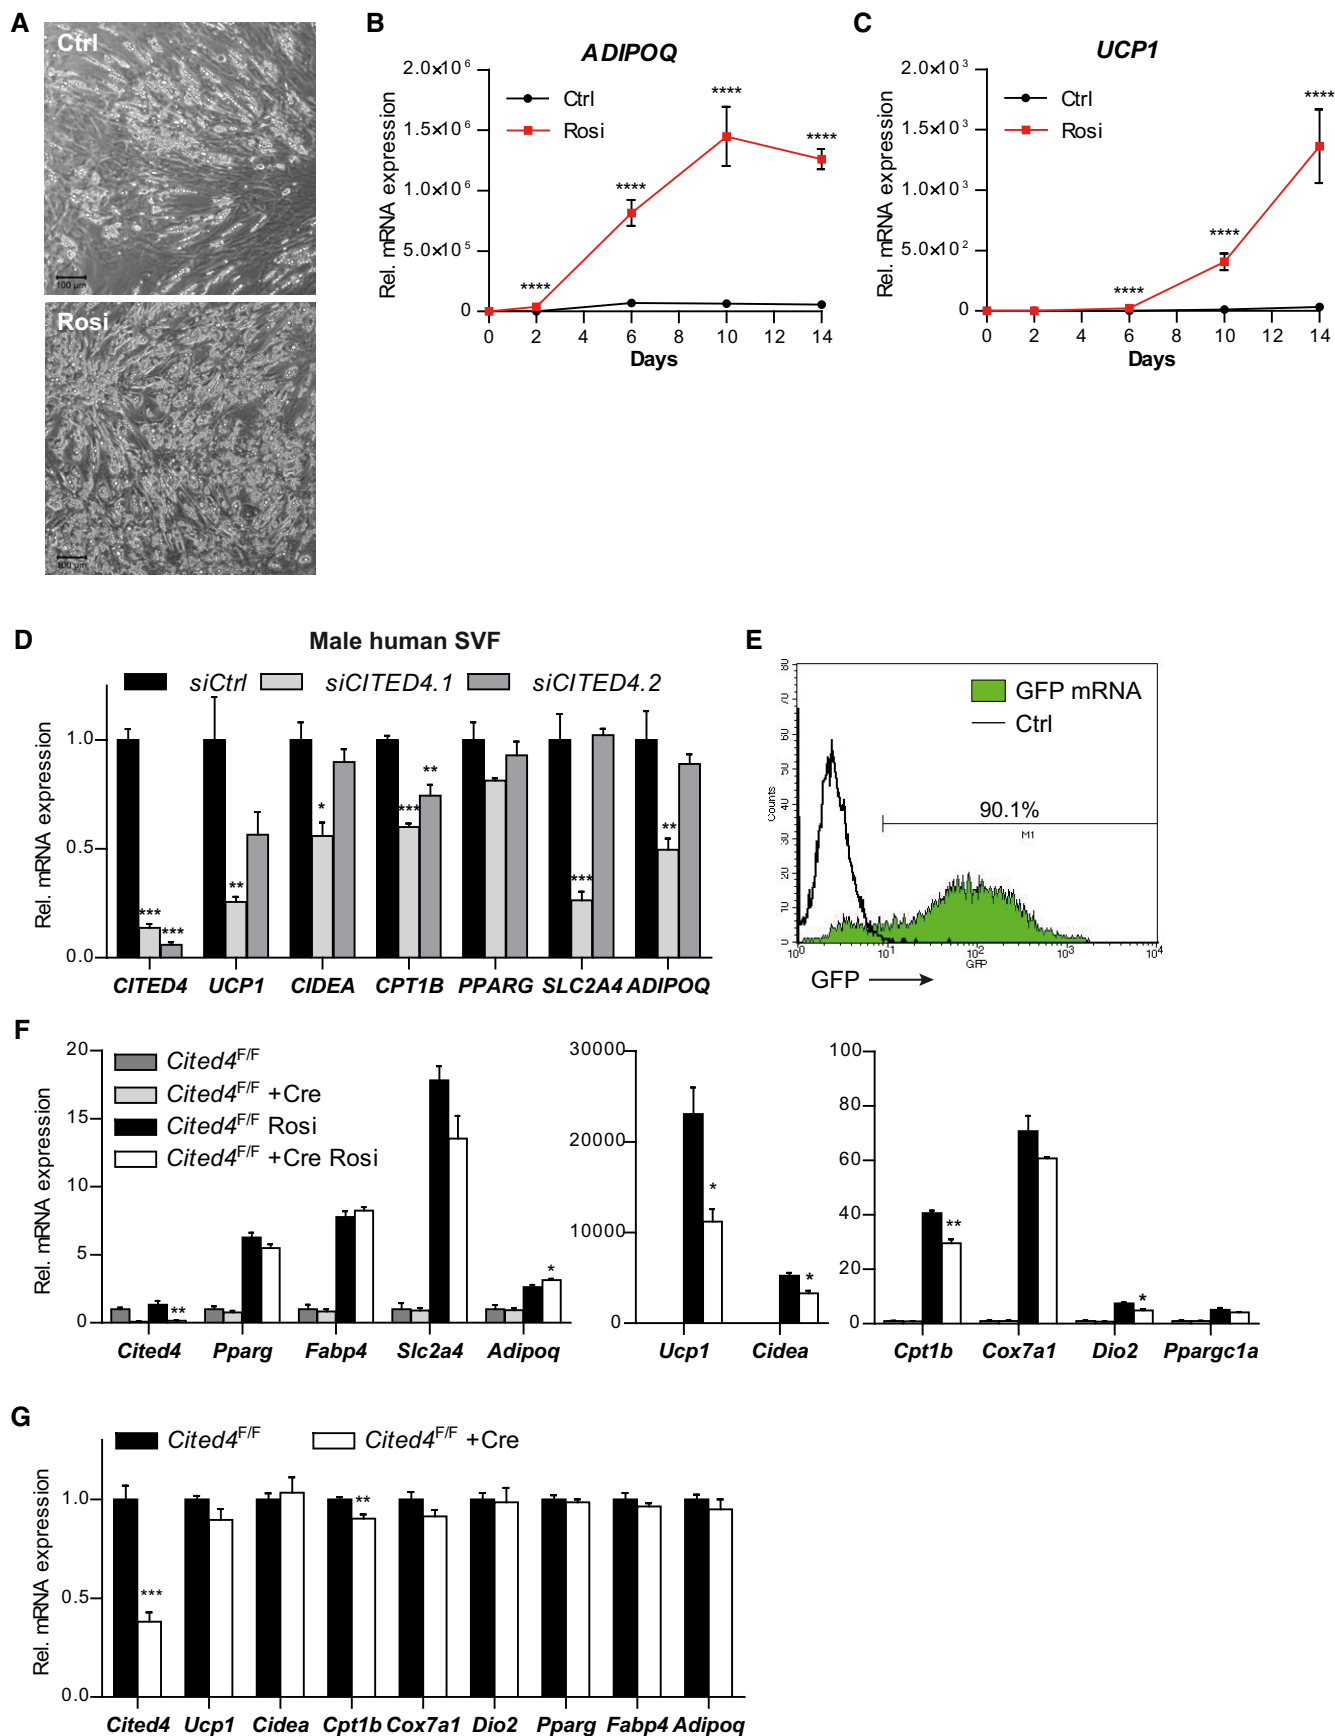

Figure EV2.

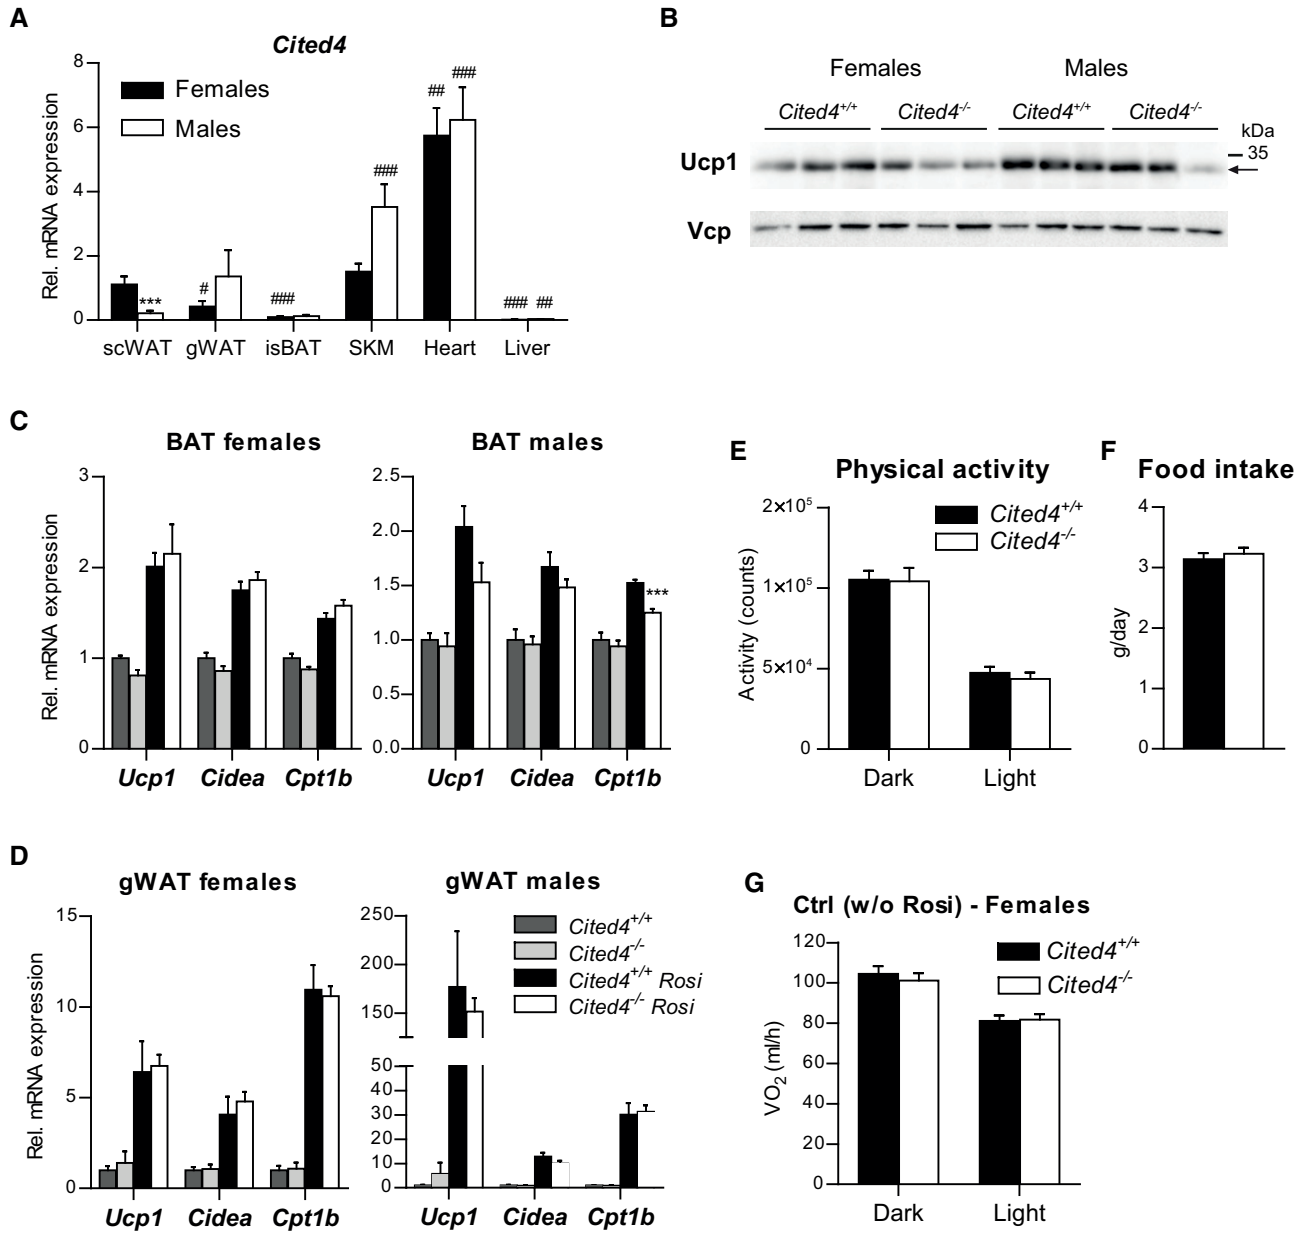

**Figure EV3. *Cited4* deficiency specifically affects rosiglitazone-mediated thermogenic expression in subcutaneous fat.**

**A** mRNA expression in wild-type mice without treatment, as determined by qRT-PCR ( $n = 6$ ). scWAT: subcutaneous white adipose tissue; gWAT: gonadal WAT; isBAT: interscapular brown adipose tissue; SKM: gastrocnemius skeletal muscle.  $2 \times 2$  ANOVA with Holm-Sidak posttests,  $***P = 0.0004$  (female vs. male),  $####P = 0.0004$ ,  $###P = 7 \times 10^{-5}$ ,  $##P = 6 \times 10^{-9}$ ,  $###P = 3 \times 10^{-10}$ , (isBAT, SKM, heart, liver, respectively, vs. scWAT within indicated sex),  $#P = 0.032$  (females: gWAT vs. scWAT),  $##P = 0.006$  (females: Heart vs. scWAT),  $###P = 0.006$  (males: Liver vs. scWAT).

**B** Ucp1 expression in scWAT of mice fed a diet with 0.0075% Rosi or control diet for 2.5 weeks, determined by Western blot with VCP as loading control ( $n = 3$ , same samples as in Fig 4C and D).

**C** mRNA expression in BAT of mice treated as in (A), determined by qRT-PCR.  $t$ -test *Cited4*<sup>-/-</sup> vs. *Cited4*<sup>+/+</sup> (Rosi), females:  $n = 5/5/6/6$ , males:  $n = 5/4/5/5$ ,  $***P = 0.0004$ .

**D** mRNA expression in gWAT of mice treated as in (A), determined by qRT-PCR.  $t$ -test *Cited4*<sup>-/-</sup> vs. *Cited4*<sup>+/+</sup> (Rosi), females:  $n = 5/5/6/6$ , males:  $n = 5/4/5/5$ .

**E** Three-day averages of total activity counts per day and mouse of female mice fed a diet with 0.0075% Rosi for 2.5 weeks, determined by Phenomaster ( $n = 9/10$ ,  $t$ -test).

**F** Three-day averages of food intake per day and mouse of female mice shown in (E) ( $n = 9/10$ ,  $t$ -test).

**G** Oxygen consumption rate of female mice fed control diet, determined by indirect calorimetry and adjusted for body weight by ANCOVA. Three-day averages of VO<sub>2</sub> were calculated for each mouse ( $n = 10$ ). ANCOVA with Bonferroni's posttest (*Cited4*<sup>-/-</sup> vs. *Cited4*<sup>+/+</sup>).

Data information: Data are presented as mean  $\pm$  SEM.

Source data are available online for this figure.

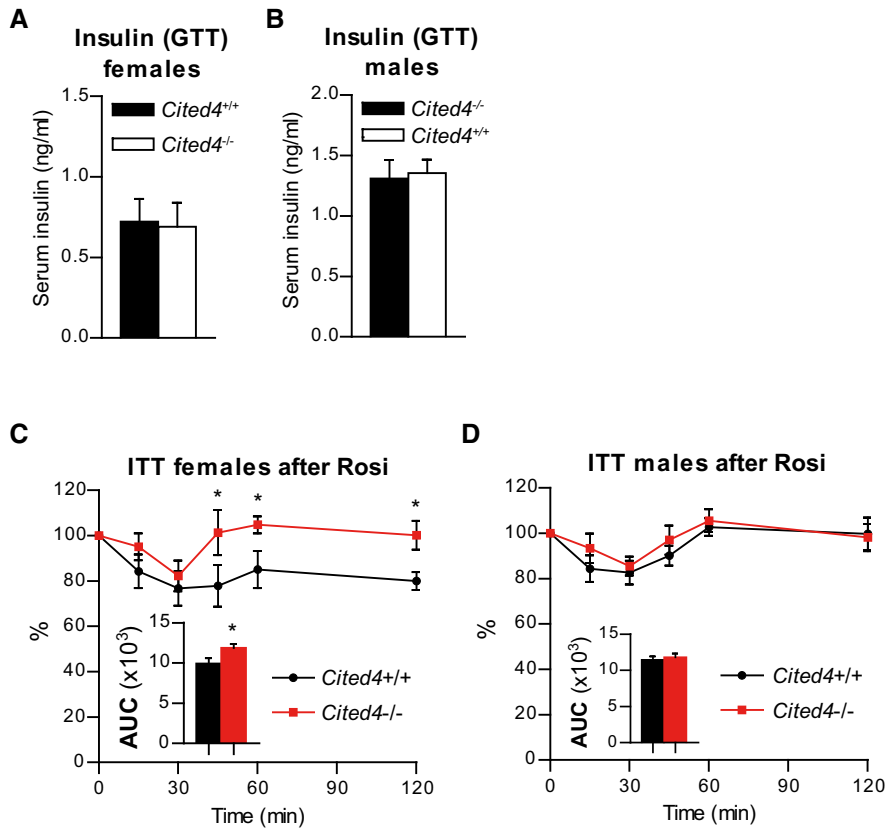

**Figure EV4. Sex-specific involvement of *Cited4* insulin sensitization upon therapeutic rosiglitazone treatment.**

A, B Serum insulin concentration 60 min after glucose injection in the GTT in mice after 11 weeks of HFD and 4 weeks of HFD + Rosi. *t*-test *Cited4<sup>-/-</sup>* vs. *Cited4<sup>+/+</sup>*, (A)  $n = 8$ , (B)  $n = 7/8$ .

C Blood glucose during insulin tolerance test (ITT) with 1 U insulin per kg lean mass on female mice after 11 weeks of HFD and 4 weeks of HFD + Rosi, expressed as % of the 0-time point value ( $n = 8$ ). \* $P = 0.015$  (45 min), \* $P = 0.039$  (60 min), \* $P = 0.035$  (120 min) in repeated-measures  $2 \times 2$  ANOVA with Holm–Sidak posttests; Inlet: AUC *t*-test *Cited4<sup>-/-</sup>* vs. *Cited4<sup>+/+</sup>* \* $P = 0.041$ .

D Blood glucose during ITT on male mice as in (C) ( $n = 7/8$ ). Repeated-measures  $2 \times 2$  ANOVA with Holm–Sidak posttests; Inlet: AUC *t*-test.

Data information: Data are presented as mean  $\pm$  SEM.
