# Supplementary material for: Cited4 is a sex‐biased mediator of the antidiabetic glitazone response in adipocyte progenitors
Source: PubMed Central journal article supplement (PMC6079535; doi:10.15252/emmm.201708613), 2018-07-04

Figure 2 - Panel D

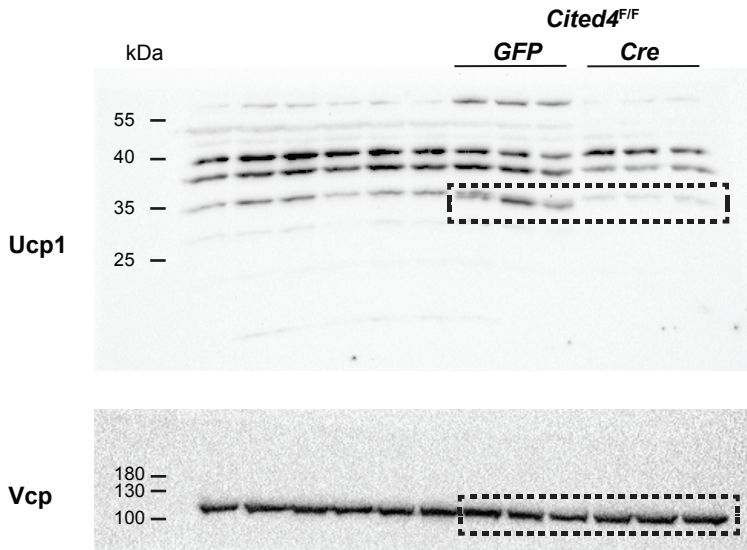

Supplement: EMMM-10-e8613-s003.pdf [file EMMM-10-e8613-s003.pdf]
