# Supplementary material for: Cited4 is a sex‐biased mediator of the antidiabetic glitazone response in adipocyte progenitors
Source: PubMed Central journal article supplement (PMC6079535; doi:10.15252/emmm.201708613), 2018-07-04

**Figure 4 - Panel C**

**Females**

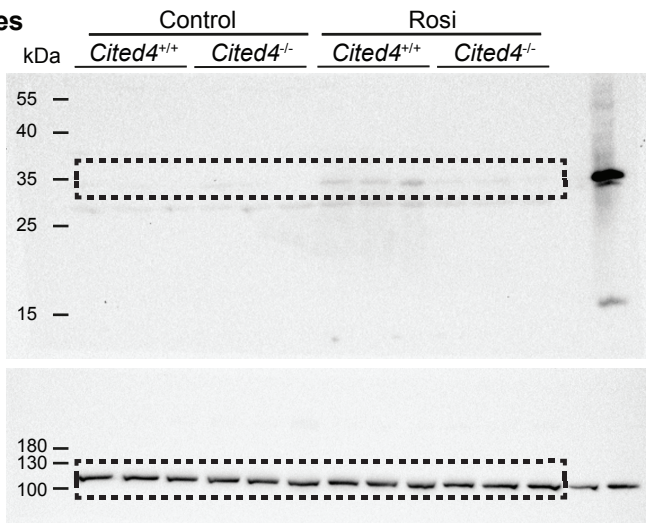

**Males**

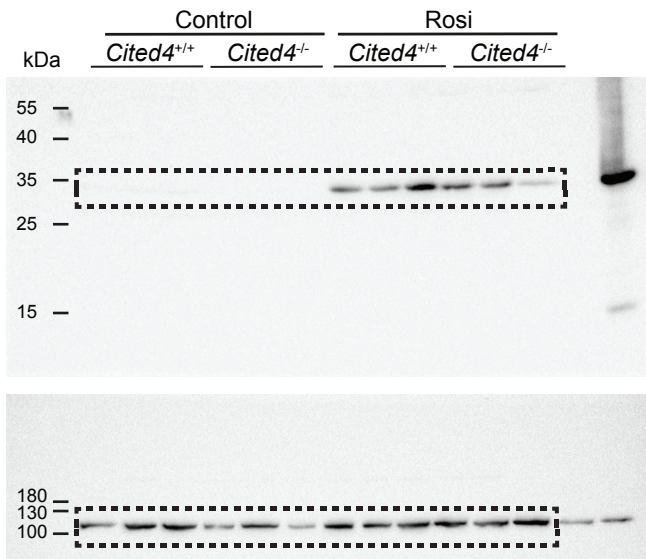

Supplement: EMMM-10-e8613-s004.pdf [file EMMM-10-e8613-s004.pdf]
